# Supplementary material
Source: Springer Nature journal article supplement (https://www.springermedizin.de/resource/supplementary/12886_2011_211_MOESM1_ESM.pdf/9473532)

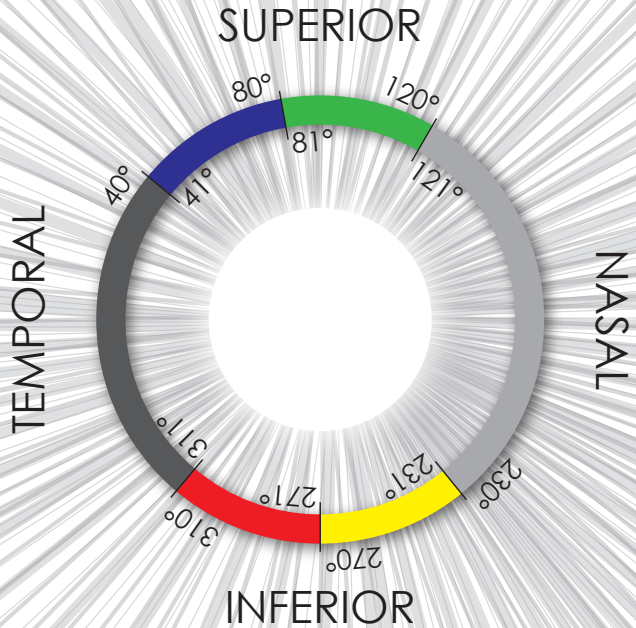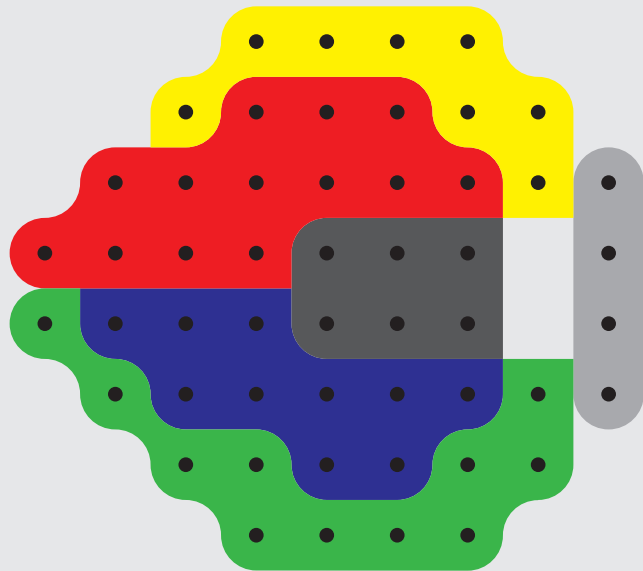

Supplement: MOESM1 [file 9473532]
